# Supplementary material for: Bis(triphenylphosphine)silver(i) perrhenate, a cyclic dimer
Source: Royal Society of Chemistry journal article supplement (doi:10.1039/c5cc01446h), 2015-01-01
Supplement: c5cc01446h1.pdf [file c5cc01446h1.pdf]

## Supplementary Information

All work was carried out excluding humidity and air in an atmosphere of dried and purified nitrogen (Westfalen AG) using vacuum glass lines or a glove box (MBraun). Solvents were dried over activated alumina. All reaction vessels were made of borosilicate glass and dried before use.

### *Preparation of $[(Ph_3P)_2AgReO_4]_2$*

The compound was obtained best from  $AgReO_4$  and  $PPh_3$  in a ratio of 1:2 in boiling acetonitrile after 16 hours as a rose colored product in 92 % yield. Redissolving in acetonitrile and slow evaporation led to the formation of colorless, light and air stable single crystals.

### *Preparation of $[Ag(PPh_3)_4][ReO_4]$*

Starting at  $AgReO_4 : PPh_3$  ratios of 1 : 3,  $[Ag(PPh_3)_4][ReO_4]$  is always obtained. The exact 1:4 ratio leads to the formation of phase pure product after 3 hours of reaction time in a benzene/acetonitrile 2/1 mixture at room temperature. After workup, the colorless precipitate was dried in vacuo, yielding the light and air stable compound (89 %). The compound is also obtained without Schlenk techniques. In order to obtain single crystals, the compound was recrystallized from benzene/acetonitrile under slow cooling (3 °C/min) from 80 °C to room temperature.

### *ATR-IR spectra (4000 – 600 $cm^{-1}$ , Figg. S1, S2), NMR and chemical analysis data*

#### a) $[Ag(PPh_3)_4][ReO_4]$ :

$^{31}P$ -NMR: +10,8 ppm (s) for coordinated  $PPh_3$  (free  $PPh_3$  is observed at -4.7 ppm).  
Elem. anal. (% found / % calc.): C 61.5, 61.45, H 4.3, 4.3, P 9.7, 8.8

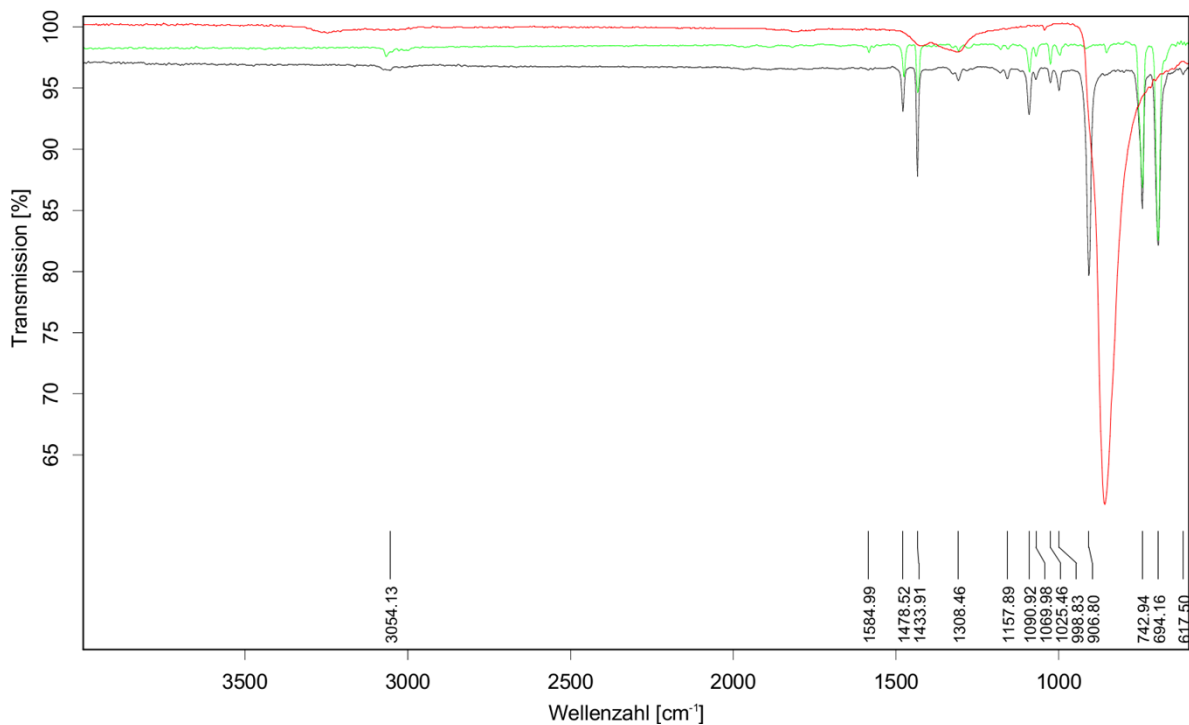

Fig. S1 IR spectra of [Ag(PPh<sub>3</sub>)<sub>4</sub>][ReO<sub>4</sub>] (black), PPh<sub>3</sub> (green) and AgReO<sub>4</sub> (red)

b) [(Ph<sub>3</sub>P)<sub>2</sub>AgReO<sub>4</sub>]<sub>2</sub>

<sup>31</sup>P-NMR: + 11.3 ppm (s)

Elem. anal. (% found / % calc.): C 49.3 / 49.0, H 3.4 / 3.4, P 7.0 / 7.2, Ag 12.1 / 12.22

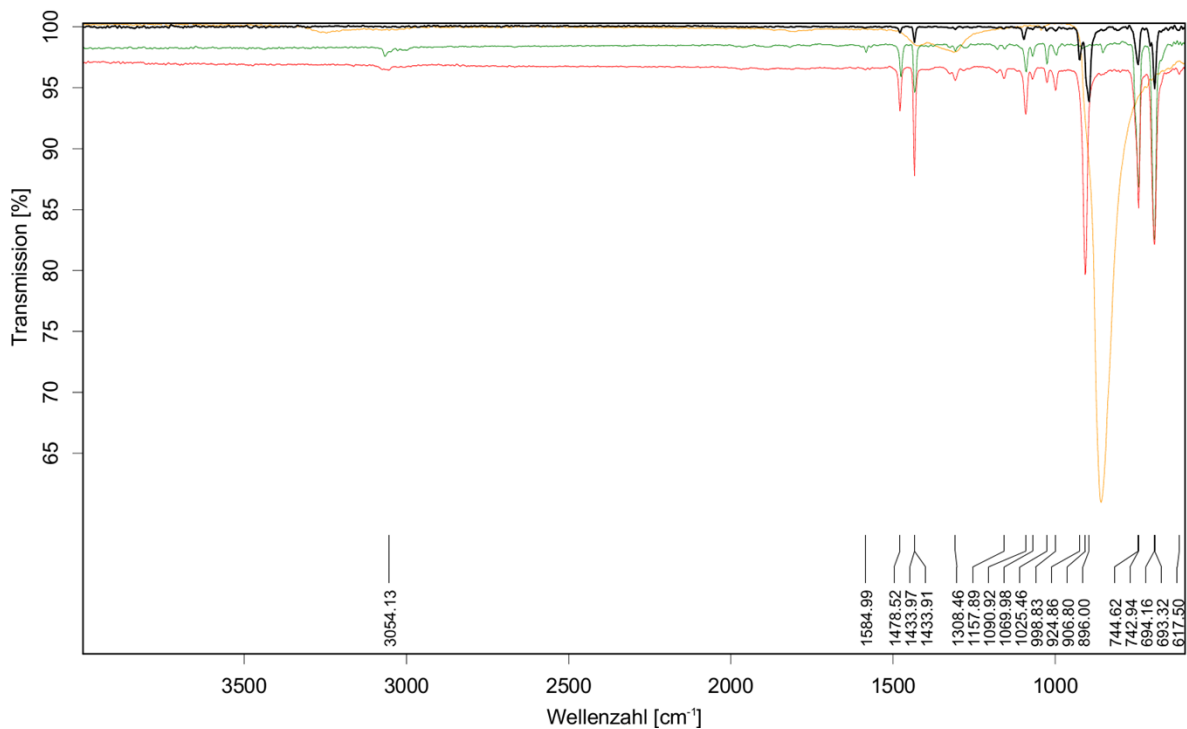

Fig. S2: IR spectra of  $[(\text{Ph}_3\text{P})_2\text{AgReO}_4]_2$  (black),  $\text{PPh}_3$  (green),  $\text{AgReO}_4$  (yellow), and  $[\text{Ag}(\text{PPh}_3)_4][\text{ReO}_4]$  (red).

Table S1. Selected crystallographic data for the compounds.

| Data                 | $[\text{Ag}(\text{PPh}_3)_4][\text{ReO}_4]$                 | $[(\text{Ph}_3\text{P})_2\text{AgReO}_4]_2$                            |
|----------------------|-------------------------------------------------------------|------------------------------------------------------------------------|
| Sum formula          | $\text{AgC}_{72}\text{H}_{60}\text{O}_4\text{P}_4\text{Re}$ | $\text{Ag}_2\text{C}_{72}\text{H}_{60}\text{O}_8\text{P}_4\text{Re}_2$ |
| Color                | colorless                                                   | colorless                                                              |
| Habitus              | block                                                       | block                                                                  |
| Formula mass [g/mol] | 1407.15                                                     | 1765.22                                                                |
| Crystal System       | trigonal                                                    | Triclinic                                                              |
| Space group (No.)    | $R\bar{3}$ (No.146)                                         | $P\bar{1}$ (No. 2)                                                     |
| $a$ [Å]              | 14.2192(1)                                                  | 12.1764(4)                                                             |
| $b$ [Å]              | 14.2192(1)                                                  | 12.4966(3)                                                             |
| $c$ [Å]              | 51.1145(9)                                                  | 13.2647(5)                                                             |
| $\alpha$ [°]         | 90                                                          | 89.938(2)                                                              |
| $\beta$ [°]          | 90                                                          | 62.745(3)                                                              |
| $\gamma$ [°]         | 120                                                         | 68.528(2)                                                              |

|                                                                                  |              |              |
|----------------------------------------------------------------------------------|--------------|--------------|
| [Å <sup>3</sup> ]                                                                | 8950.0(2)    | 1635.6(1)    |
| <i>Z</i>                                                                         | 6            | 1            |
| $\rho_{calc.}$ [g/cm <sup>3</sup> ]                                              | 1.56         | 1.79         |
| $\lambda$ [Å] (MoK $\alpha$ )                                                    |              | 0.71073      |
| <i>T</i> [K]                                                                     |              | 123(2)       |
| <i>R</i> <sub>int</sub>                                                          | 0.064        | 0.062        |
| <i>h</i>                                                                         | -23 to 24    | -21 to 21    |
| <i>k</i>                                                                         | -25 to 25    | -12 to 22    |
| <i>l</i>                                                                         | -89 to 90    | -23 to 23    |
| <i>S</i> ( $I \geq 2\sigma(I)$ , all data)                                       | 0.92, 0.92   | 0.78, 0.78   |
| <i>R</i> ( <i>F</i> ) ( $I \geq 2\sigma(I)$ , all data)                          | 0.051, 0.095 | 0.040, 0.112 |
| <i>wR</i> ( <i>F</i> <sup>2</sup> ) ( $I \geq 2\sigma(I)$ , all data)            | 0.128, 0.141 | 0.085, 0.075 |
| Reflections/Parameters/Restraints                                                | 22832/496/1  | 18415/416/0  |
| $\Delta\rho_{max.}$ [eÅ <sup>-3</sup> ]; $\Delta\rho_{min.}$ [eÅ <sup>-3</sup> ] | 4.27, -3.42  | 3.16, -3.32  |

Both structures were solved using the Patterson method implemented in Shelxs and refined using Shelxl. [Ag(PPh<sub>3</sub>)<sub>4</sub>][ReO<sub>4</sub>] was refined as an inversion twin in spacegroup *R*3 in which one of the perrhenate anions is disordered. Refinements in the centrosymmetric space group *R*-3 showed a completely disordered ReO<sub>4</sub><sup>-</sup> anion, worse *R*-values and the refinement did not converge. The residual electron density is located close to the Re atoms. The structure of the cyclic dimer only showed some disorder in the O-atoms not coordinating to Ag cations. All H-atoms were located and refined using a riding model. Further details of the crystal structure investigations are available from the Fachinformationszentrum Karlsruhe, D-76344 Eggenstein-Leopoldshafen (Germany), <http://www.fiz-karlsruhe.de/icsd.html>, on quoting the depository numbers CSD- 429166 for [Ag(PPh<sub>3</sub>)<sub>4</sub>][ReO<sub>4</sub>] and CSD- 429165 for [(Ph<sub>3</sub>P)<sub>2</sub>AgReO<sub>4</sub>]<sub>2</sub>.

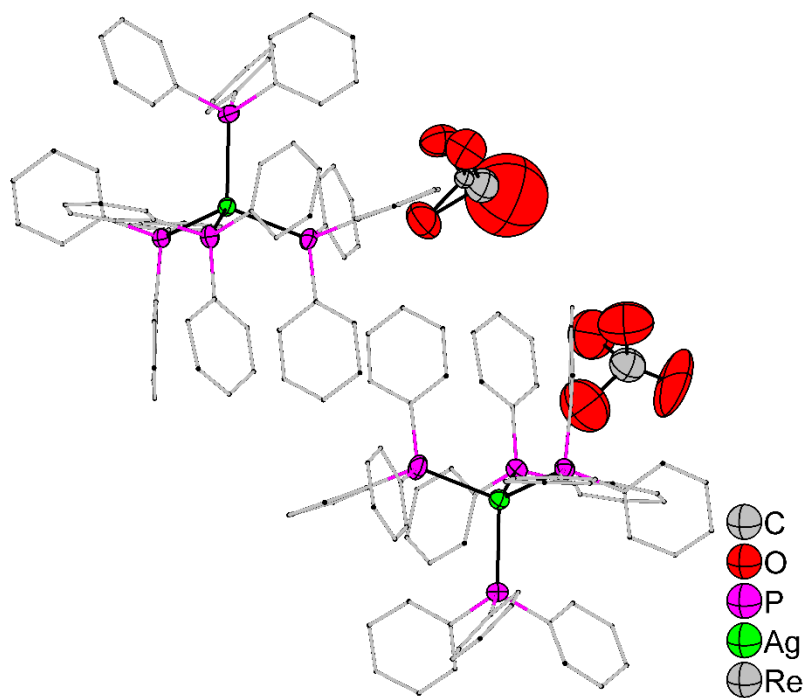

*Figure S3.* A section of the crystal structure of  $[\text{Ag}(\text{PPh}_3)_4][\text{ReO}_4]$  where the disorder of one  $\text{ReO}_4^-$  anions becomes obvious. Thermal displacement parameters are shown at the 70 % level at 123 K. H atoms are omitted and the C atoms are shown as a wire-frame for the sake of clarity.
